# Supplementary material
Source: ML conference proceedings conference paper supplement (https://proceedings.mlr.press/v216/yang23b.html)
Supplement: Supplementary file 1 [file yang23b-supp.pdf]

---

# Mixture of Normalizing Flows for European Option Pricing (Supplementary Material)

---

## 1 CONSTRAINTS TRANSLATION

Given our NF model for option pricing,

$$f_\theta(K; z) = e^{-r\tau} F_\tau \int_{-\infty}^{+\infty} [\mathbb{I}(z) \left( \frac{e^x}{\text{SG}(\mu_\theta)} - \frac{K}{F_\tau} \right)]_+ q_\theta(x) dx \quad (1)$$

where  $\mu_\theta = \int_{-\infty}^{+\infty} e^x q_\theta(x) dx$ . We are going to prove that, as long as  $q_\theta$  is a valid density function, i.e.,

$$q_\theta \geq 0 \quad \int_{-\infty}^{+\infty} q_\theta(x) dx = 1 \quad (2)$$

The constraints (C1) – C(4) for call option pricing and the constraints (P1) – P(4) for put option pricing will be met. For the ease of notation, we drop some subscripts and write the pricing functions for call and put option separately.

$$C(K) = e^{-r\tau} F \int_{\log(\frac{K\mu}{F})}^{+\infty} \left( \frac{e^x}{\mu} - \frac{K}{F} \right) q(x) dx \quad (C)$$

$$P(K) = e^{-r\tau} F \int_{-\infty}^{\log(\frac{K\mu}{F})} \left( \frac{K}{F} - \frac{e^x}{\mu} \right) q(x) dx \quad (P)$$

The following constraints must be met for a non-arbitrage pricing model.

$$\frac{\partial C(K)}{\partial K} \leq 0 \quad (C1)$$

$$\frac{\partial^2 C(K)}{\partial K^2} \geq 0 \quad (C2)$$

$$C(\infty) = 0 \quad (C3)$$

$$\max(0, e^{-r\tau}(F - K)) \leq C(K) \leq e^{-r\tau} F \quad (C4)$$

$$\frac{\partial P(K)}{\partial K} \geq 0 \quad (P1)$$

$$\frac{\partial^2 P(K)}{\partial K^2} \geq 0 \quad (P2)$$

$$P(0) = 0 \quad (P3)$$

$$\max(0, e^{-r\tau}(K - F)) \leq P(K) \leq e^{-r\tau} K \quad (P4)$$

For (C1),

$$\frac{\partial C(K)}{\partial K} = -e^{-r\tau} \int_{\log(\frac{K\mu}{F})}^{+\infty} q(x)dx \leq 0 \quad (3)$$

For (C2)

$$\frac{\partial^2 C(K)}{\partial K^2} = \frac{e^{-r\tau}}{K} q(\log(\frac{K\mu}{F})) \geq 0 \quad (4)$$

For (C3),

$$C(\infty) = e^{-r\tau} F \int_{+\infty}^{+\infty} (\frac{e^x}{\mu} - \frac{K}{F})q(x)dx = 0 \quad (5)$$

For (C4), the upper bound is achieved when  $K = 0$  (C1), and

$$C(0) = e^{-r\tau} F \int_{-\infty}^{+\infty} \frac{e^x}{\mu} q(x)dx = e^{-r\tau} F \quad (6)$$

Note that we have  $C'(0) = \frac{\partial C(K)}{\partial K}|_{K=0} = -e^{-r\tau}$ , and  $C'(\cdot)$  is a non-decreasing function (C2), which means  $C'(K) \geq C'(0)$ . Then,

$$C(K) = C(0) + \int_0^K C'(y)dy \quad (7)$$

$$\geq C(0) + \int_0^K C'(0)dy \quad (8)$$

$$= C(0) + KC'(0) \quad (9)$$

$$= e^{-r\tau} F - Ke^{-r\tau} \quad (10)$$

$$= e^{-r\tau}(F - K) \quad (11)$$

Besides,  $C(K) \geq C(\infty) = 0$ , thus the tighter lower bound should be  $\max(0, e^{-r\tau}(F - K))$ .

For (P1),

$$\frac{\partial P(K)}{\partial K} = e^{-r\tau} \int_{-\infty}^{\log(\frac{K\mu}{F})} q(x)dx \geq 0 \quad (12)$$

For (P2),

$$\frac{\partial^2 P(K)}{\partial K^2} = \frac{e^{-r\tau}}{K} q(\log(\frac{K\mu}{F})) \geq 0 \quad (13)$$

For (P3),

$$P(0) = e^{-r\tau} F \int_{-\infty}^{-\infty} (\frac{K}{F} - \frac{e^x}{\mu})q(x)dx = 0 \quad (14)$$

For (P4), we can follow the similar procedure as we prove (C4). However, since C(4) has already been proved, we can simply apply put-call parity,

$$P(K) = C(K) - e^{-r\tau} F + e^{-r\tau} K \quad (15)$$

Thus we have

$$\max(0, e^{-r\tau}(K - F)) \leq P(K) \leq e^{-r\tau} K \quad (16)$$
